# Supplementary material for: Stable aneuploid tumors cells are more sensitive to TTK inhibition than chromosomally unstable cell lines
Source: PubMed Central journal article supplement (PMC5503534; doi:10.18632/oncotarget.16213), 2017-03-15
Supplement: oncotarget-08-38309-s001.pdf [file oncotarget-08-38309-s001.pdf]

## Stable aneuploid tumors cells are more sensitive to TTK inhibition than chromosomally unstable cell lines

### Supplementary Materials

#### A Normal Mitosis: HCT 116 Vehicle

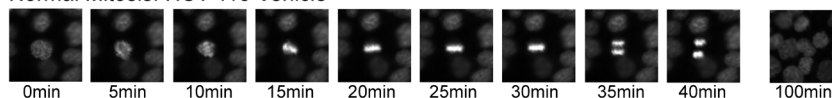

#### B Mitotic slippage: HCT 116 NTRC 0066-0

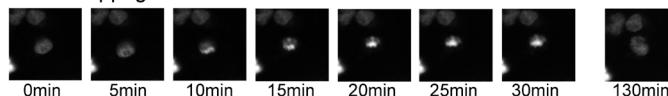

#### C Multipolar spindle: DoTc2 4510 Vehicle

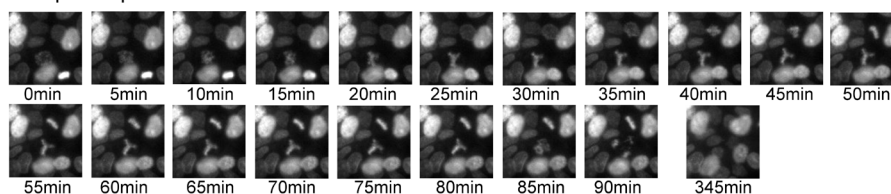

#### D Micro-nuclei: DoTc2 4510 Vehicle

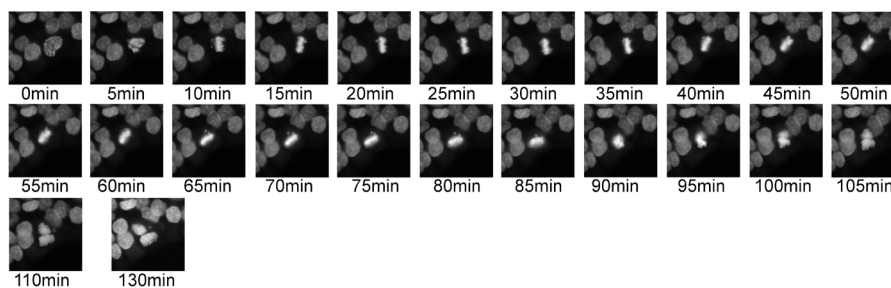

#### E DNA bridge: DoTc2 4510 Vehicle

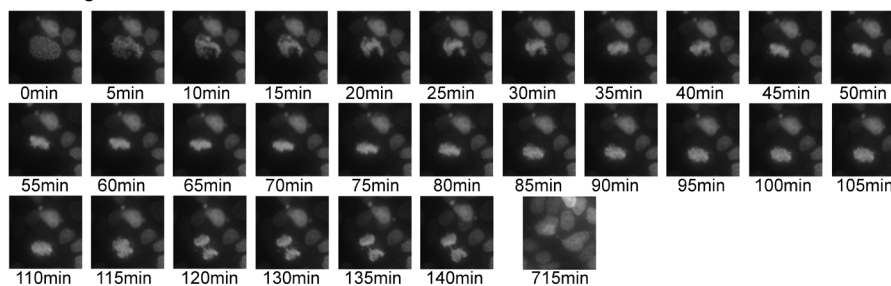

#### F At least 2 phenotypes: DoTc2 4510 NTRC 0066-0

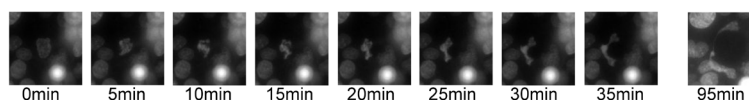

**Supplementary Figure 1: Mitotic timing and mis-segregation phenotypes.** Representative images from time-lapse microscopy. Examples show the length of mitosis and the observed mis-segregation phenotypes. (A) Normal mitosis: HCT116 Vehicle (B) Mitotic slippage: HCT 116 NTRC 0066-0 (C) Multipolar Spindle: DoTc2 4510 Vehicle (D) Micro-nuclei: DoTc2 4510 Vehicle (E) DNA bridge: DoTc2 4510 Vehicle (F) At least 2 phenotypes, mitotic slippage and DNA bridge: DoTc2 4510 NTRC 0066-0.

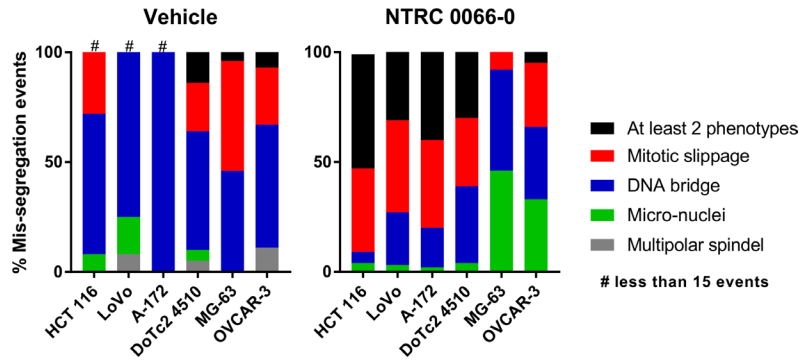

**Supplementary Figure 2: Mis-segregation phenotypes breakdown.** Resistant or sensitive cells lines treated with Vehicle or NTRC 0066-0.

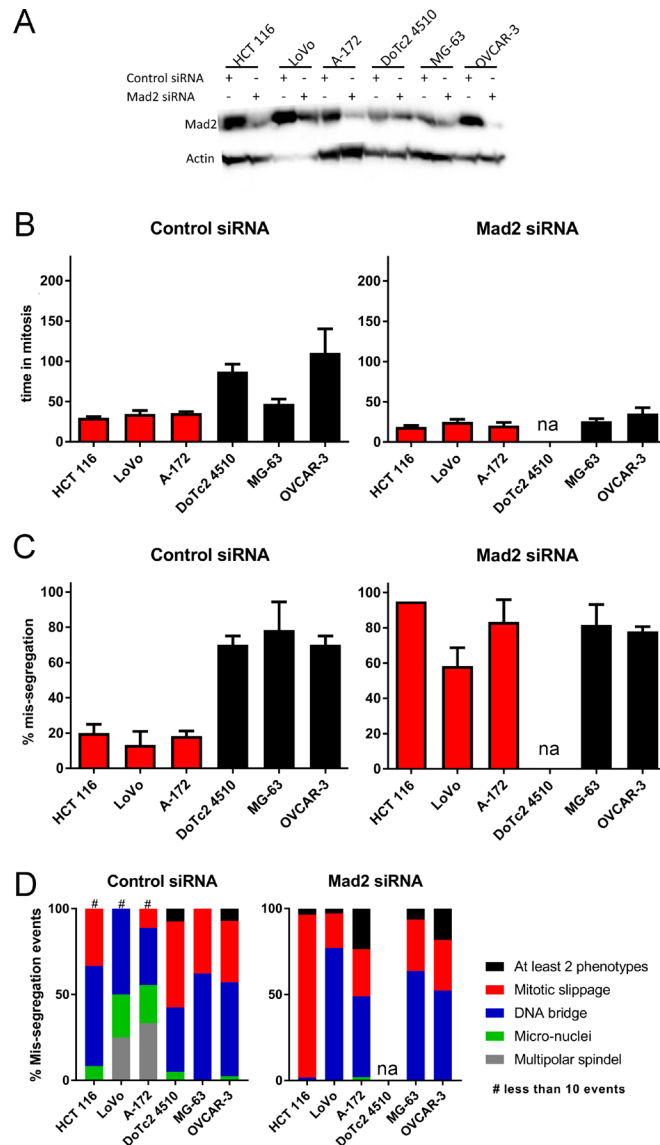

**Supplementary Figure 3: Mitotic timing and mis-segregation upon reduction of Mad2 level.** (A) Representative immunoblot showing the expression of the Mad2 protein in six cell lines treated with control siRNA or Mad2 siRNA. Actin Immuno-blot serves as loading control. Mad2 expression was reduced in all cell lines except DOTC 4510. The experiment has been performed three times. (B–D) Time lapse microscopy analysis of NTRC0066-0 sensitive (red) and resistant (black) cell lines treated with control siRNA (left) or siRNA for Mad2 (right). The bar graphs represent means and standard deviation calculated from three independent experiments. For one experiment 25 cells were quantified on average. na = non-applicable. A) Time in mitosis (from nuclear envelope breakdown to anaphase onset). B) Percentage of cells dividing with mis-segregation. D) Mis-segregation phenotypes breakdown.

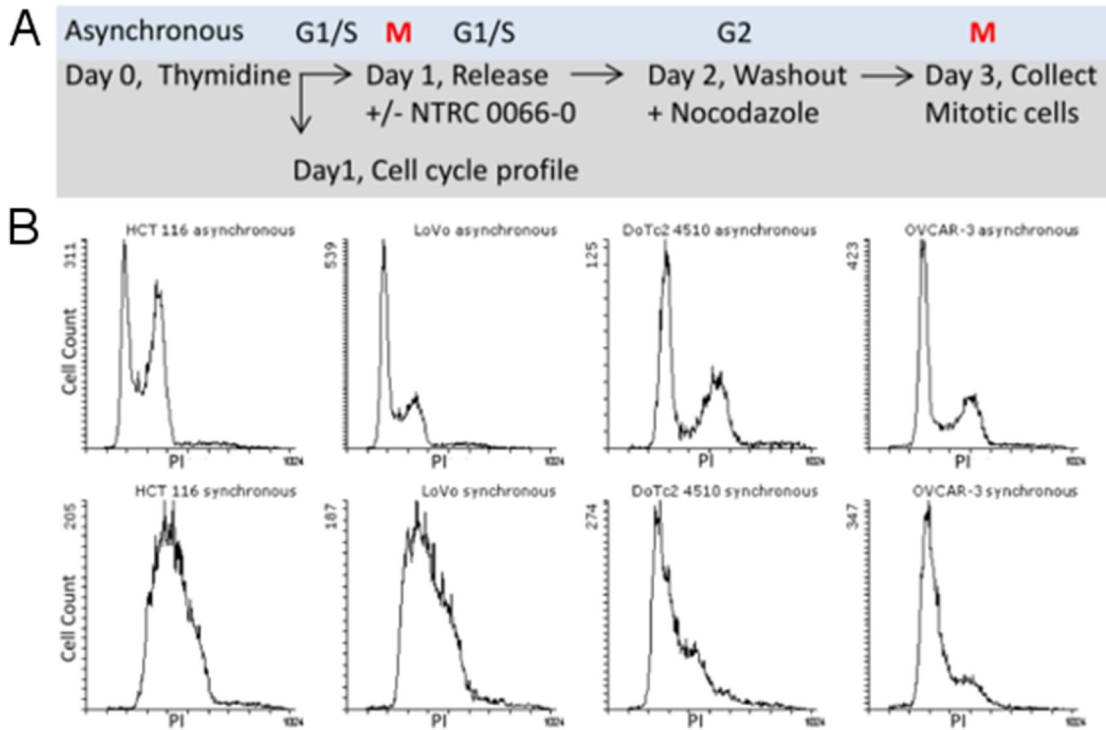

**Supplementary Figure 4: Experimental set-up for karyotype analysis.** (A) Scheme representing the experimental steps. Asynchronous cells were treated with Thymidine for 24 hours. The cells arrest in G1/S. Simultaneously, thymidine was washed-out and NTRC 0066-0 (100 nM) or vehicle were added. It allows cells to resume the cell cycle and go through mitosis (M). The progeny can start a new cell cycle (G1/S). The next day, before the start of the second mitosis, in G2, NTRC 0066-0 or the vehicle were washed-out and Nocodazole was added. Nocodazole trapped the cells at the second mitosis and cells were collected for metaphase spreads. (B) Cell cycle histogram showing on the X axis Propidium Iodide (PI) staining intensity and on the Y axis the cell counts. On the upper panel, untreated cells and on the lower panel are cells treated with Thymidine for 24 hours. The upper panel shows asynchronous HCT 116, LoVo, DoTC2 4510 and, OVCAR-3 cell lines, with a clear mitotic population. The lower panel shows synchronous population of the four cell lines.

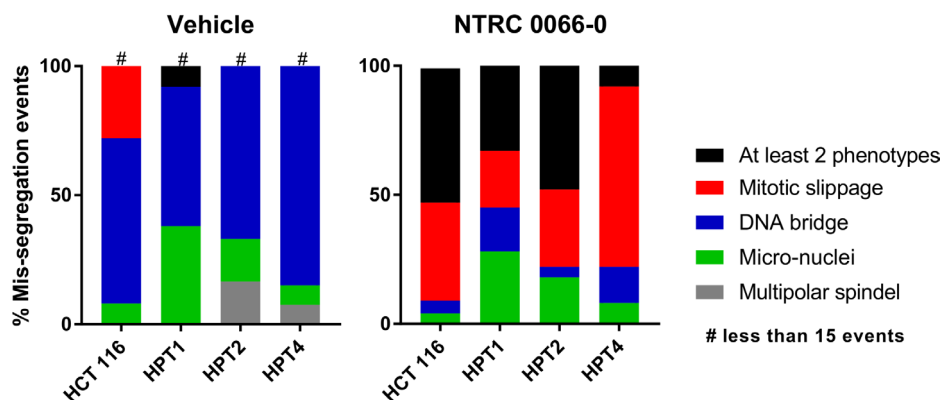

**Supplementary Figure 5: Mis-segregation phenotypes breakdown.** HCT 116, HPT1, HPT2 and, HPT4 cells lines treated with Vehicle or NTRC 0066-0.

**Supplementary Table 1: Anti-proliferative activity (IC<sub>50</sub>, in nM) of TTK inhibitors in 3 and 5 day cancer cell line proliferation assays**

| Cell line                             | NTRC 0066-0     |        | MPI-047605       |        | Bay 2b | reversine |
|---------------------------------------|-----------------|--------|------------------|--------|--------|-----------|
|                                       | 3 days          | 5 days | 3 days           | 5 days | 5 days | 5 days    |
| HCT 116                               | 37              | 41     | 234              | 1387   | 175    |           |
| LoVo                                  | 40              | 35     | 220              | 1434   | 113    |           |
| A-172                                 | 51              | 34     | 198              | 1628   | 158    |           |
| DoTc2 4510                            | 117             | 225    | 8392             | 2559   | 416    |           |
| MG-63                                 | 135             | 260    | 899              | 3757   | 434    |           |
| OVCAR-3                               | 897             | 268    | 7328             | 5486   | 441    |           |
| <sup>a</sup> average IC <sub>50</sub> | <sup>b</sup> 67 | 98     | <sup>b</sup> 448 | 1820   | 239    |           |

<sup>a</sup>geometric average of IC<sub>50</sub> in 66 cancer cell lines, except <sup>b</sup> in 44 cell lines [1, 2]

1. Maia AR, de Man J, Boon U, Janssen A, Song JY, Omerzu M, Sterrenburg JG, Prinsen MB, Willemsen-Seegers N, de Roos JA, van Doornmalen AM, Uitdehaag JC, Kops GJ, et al. Inhibition of the spindle assembly checkpoint kinase TTK enhances the efficacy of docetaxel in a triple-negative breast cancer model. *Ann Oncol.* 2015; 26:2180–92. doi: 10.1093/annonc/mdv293.
2. Uitdehaag JC, de Roos JA, Prinsen MB, Willemsen-Seegers N, de Vetter JR, Dylus J, van Doornmalen AM, Kooijman J, Sawa M, van Gerwen SJ, de Man J, Buijsman RC, Zaman GJ. Cell panel profiling reveals conserved therapeutic clusters and differentiates the mechanism of action of different PI3K/mTOR, Aurora kinase and EZH2 inhibitors. *Mol Cancer Ther.* 2016. doi: 10.1158/1535-7163.MCT-16-0403.

## Supplementary Table 2: Drug sensitivity analysis in HCT116 diploid and tetraploids

### A: Differences based on potency ( $IC_{50}$ )

| Compound    | Target            | HCT 116        | HPT1           | HPT2           | HPT4           | HCT 116 vs HPT1, -2 and -4 |           |                 |
|-------------|-------------------|----------------|----------------|----------------|----------------|----------------------------|-----------|-----------------|
|             |                   | $IC_{50}$ (nM) | $IC_{50}$ (nM) | $IC_{50}$ (nM) | $IC_{50}$ (nM) | $\Delta pIC_{50}$          | Phenotype | <i>p</i> -value |
| doxorubicin | topoisomerase II  | 31             | 69             | 130            | 83             | 0.46                       | resistant | 0.0002          |
| NTRC 0066-0 | TTK               | 44             | 40             | 44             | 44             | -0.01                      | sensitive | 0.844           |
| reversine   | TTK               | 242            | 208            | 253            | 159            | -0.08                      | sensitive | 0.463           |
| Mps-Bay2b   | TTK               | 1581           | 1894           | 1798           | 1578           | 0.04                       | resistant | 0.554           |
| MPI-479605  | TTK               | 233            | 208            | 199            | 191            | -0.07                      | sensitive | 0.580           |
| MLN-8054    | Aurora A kinase   | 715            | 1330           | 1553           | 1196           | 0.28                       | resistant | 0.001           |
| GSK-1070916 | Aurora B/C kinase | 14             | 16             | 1700           | 1679           | 1.41                       | resistant | 0.041           |
| volasertib  | PLK1              | 25             | 26             | 45             | 49             | 0.19                       | resistant | 0.062           |
| STLC        | kinesin Eg5       | 711            | 2042           | 1340           | 1401           | 0.34                       | resistant | 0.0002          |

$IC_{50}$  are geometric averages of three experiments.  $\Delta pIC_{50}$  are the average log shift in sensitivity between parental and tetraploids. 'resistant' indicates that tetraploids are resistant. Student's *t*-test *p*-values are based on a two tailed distribution of three values. Bold indicates when differences were statistically significant,  $p < 0.05$ .

### B: Differences in sensitivity based on efficacy (% effect)

| Compound    | Target            | HCT 116  | HPT1         | HPT2 | HPT4              | HCT 116 vs HPT1, -2 and -4 |                 |         |
|-------------|-------------------|----------|--------------|------|-------------------|----------------------------|-----------------|---------|
|             |                   | Eff. (%) | Efficacy (%) |      | $\Delta$ eff. (%) | Phenotype                  | <i>p</i> -value |         |
| doxorubicin | topoisomerase II  | 97       | 99           | 100  | 100               | 3                          | sensitive       | 0.013   |
| NTRC 0066-0 | TTK               | 80       | 59           | 36   | 48                | -33                        | resistant       | 0.001   |
| reversine   | TTK               | 77       | 58           | 44   | 33                | -32                        | resistant       | 0.001   |
| Mps-Bay2b   | TTK               | 87       | 66           | 49   | 52                | -31                        | resistant       | 0.0002  |
| MPI-479605  | TTK               | 72       | 52           | 46   | 51                | -22                        | resistant       | 0.0002  |
| MLN-8054    | Aurora A kinase   | 85       | 61           | 52   | 56                | -28                        | resistant       | 0.00001 |
| GSK-1070916 | Aurora B/C kinase | 61       | 32           | 100  | 100               | 16                         | sensitive       | 0.456   |
| volasertib  | PLK1              | 98       | 82           | 65   | 84                | -21                        | resistant       | 0.004   |
| STLC        | kinesin Eg5       | 99       | 90           | 93   | 95                | -6                         | resistant       | 0.003   |

% effect values (Eff.) are averages of three experiments.

### Supplementary Table 3: Sensitivity of organoids to NTRC 0066-0 and reversine in proliferation assays

| Organoid | NTRC 0066-0    |            | reversine      |            | difference        |                 |
|----------|----------------|------------|----------------|------------|-------------------|-----------------|
|          | $IC_{50}$ (nM) | $pIC_{50}$ | $IC_{50}$ (nM) | $pIC_{50}$ | $\Delta pIC_{50}$ | <i>p</i> -value |
| p14      | 22.5           | 7.65       | 493.0          | 6.33       | 1.34              | <b>0.0004</b>   |
| p18      | 22.1           | 7.68       | 284.9          | 6.57       | 0.96              | 0.0504          |
| p28      | 37.0           | 7.43       | 757.1          | 6.19       | 1.22              | <b>0.0029</b>   |
| All      |                | 7.59       |                | 6.36       | 1.17              | <b>0.0008</b>   |

Anti-proliferative activity is expressed as  $IC_{50}$  and  $pIC_{50}$ . Results are shown from three different independent experiments and geometric average of  $pIC_{50}$ . Difference in sensitivity is expressed as  $\Delta pIC_{50}$ . Bold *p*-values indicate statistically significant ( $p < 0.05$ ).
